# Supplementary material
Source: Springer Nature journal article supplement (https://www.springermedizin.de/resource/supplementary/12891_2010_1108_MOESM2_ESM.pdf/9507744)

# Sickness absence

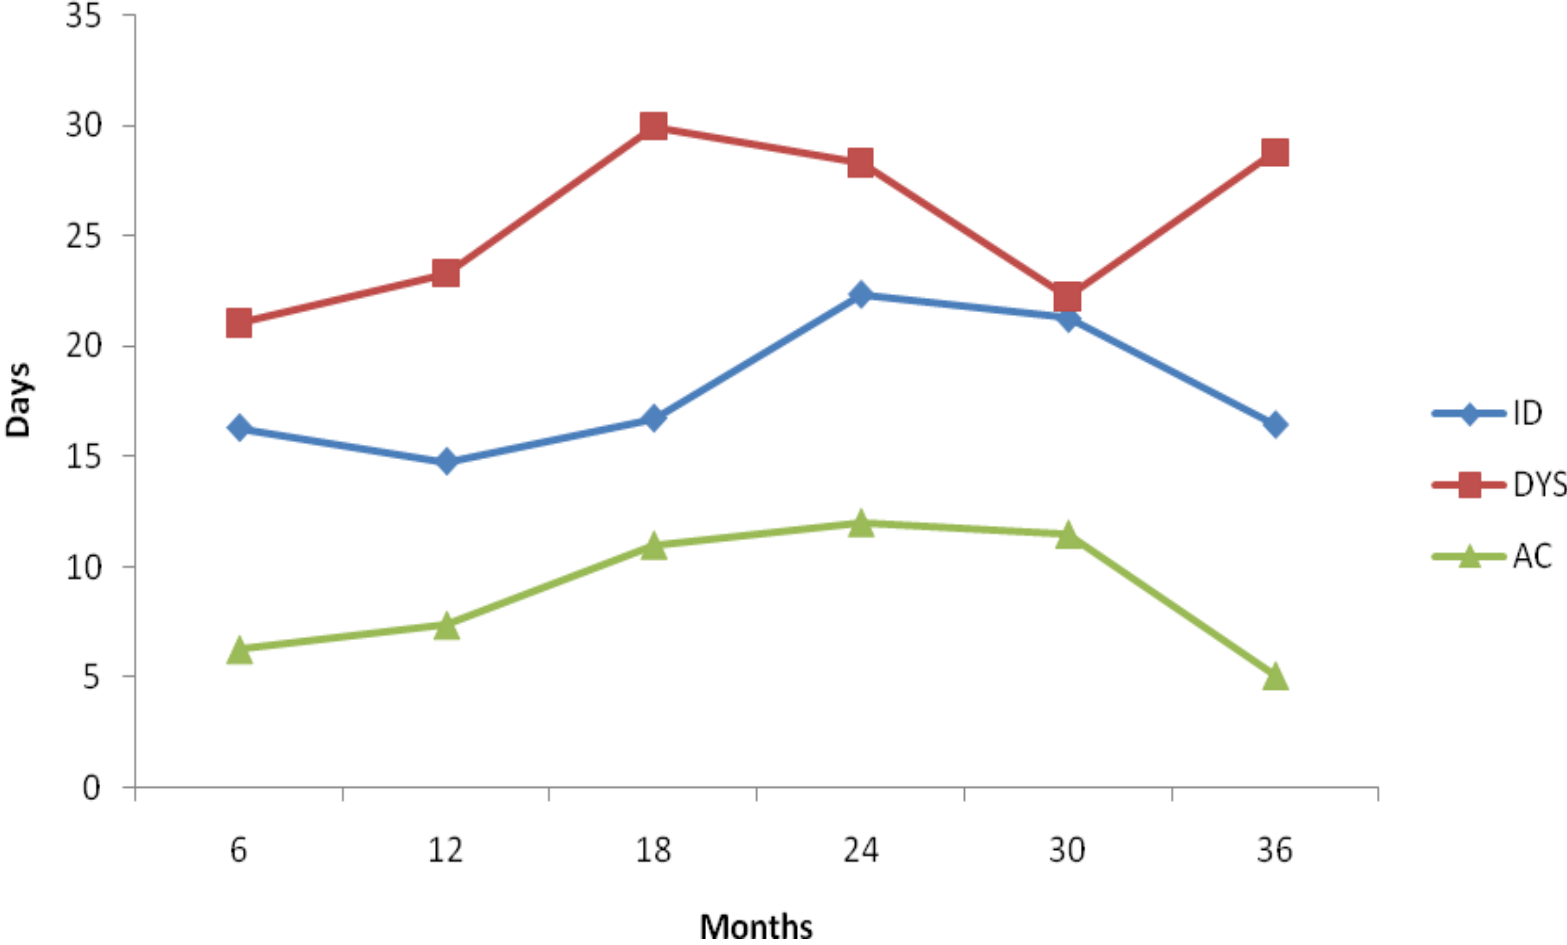

Supplement: MOESM2 [file 9507744]
